# Supplementary material for: A facile method to synthesize small-sized and superior crystalline Cs0.32WO3nanoparticles for transparent NIR shielding coatings
Source: Royal Society of Chemistry journal article supplement (doi:10.1039/c9ce00225a), 2019-01-01
Supplement: c9ce00225a1.pdf [file c9ce00225a1.pdf]

Supporting Information

**A Facile method to Synthesize Small Size and Superior Crystalline  
Cs<sub>0.32</sub>WO<sub>3</sub> Nanoparticles for Transparent NIR Shielding Coatings**

Shuai Qi <sup>a,b</sup>, Xiudi Xiao <sup>a,\*</sup>, Yuan Lu <sup>a,c</sup>, Changmeng Huan <sup>a,c</sup>, Yongjun Zhan <sup>a</sup>,

Hongsha Liu <sup>a,d</sup>, Gang Xu <sup>a</sup>

<sup>a</sup> Guangzhou Institute of Energy Conversion, Key Laboratory of Renewable Energy,  
Guangdong Provincial Key Laboratory of New and Renewable Energy Research and  
Development, Chinese Academy of Sciences, Guangzhou 510640, PR China

<sup>b</sup> Nano Science and Technology Institute, University of Science and Technology of  
China, Suzhou 215123, PR China

<sup>c</sup> University of Chinese Academy of Sciences, Beijing 100049, PR China

<sup>d</sup> Department of Thermal Science and Energy Engineering, University of Science and  
Technology of China, Hefei 230031, PR China

\*Corresponding author. Tel: 86-20-37279344. Fax: 86-20-37278821.

E-mail address: xiaoxd@ms.giec.ac.cn

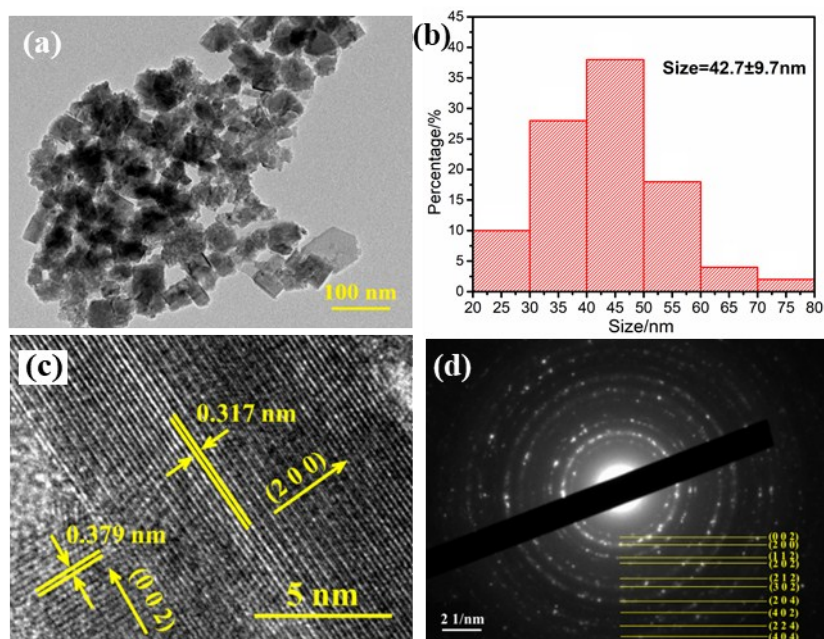

**Fig. S1.** (a) TEM image, (b) Size distribution result, (c) HR-TEM image and (d) SAED pattern of the optimal  $\text{Cs}_x\text{WO}_3$  nanoparticles.

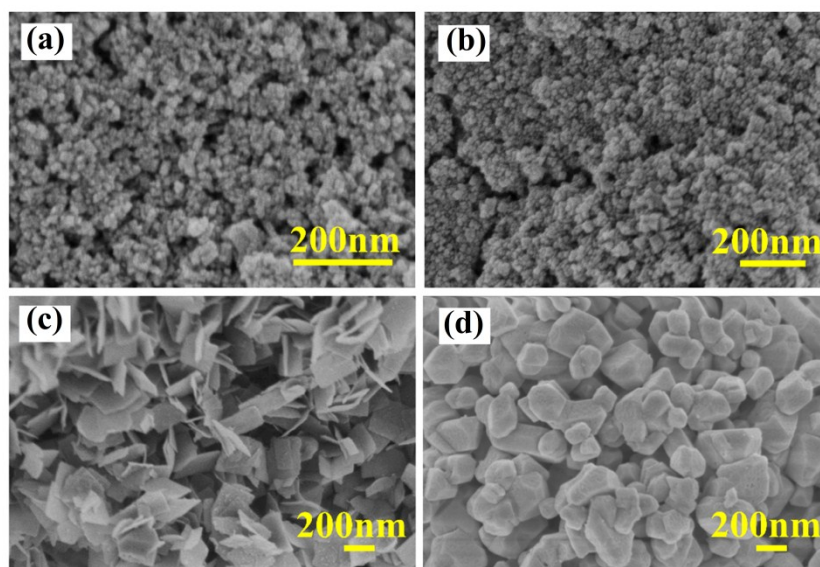

**Fig. S2.** SEM images of obtained blue, orange and mauve precursor precipitate, respectively, after solvothermal reaction at 100 °C for 4 h (a, c and d) and obtained blue precursor precipitate after solvothermal reaction at 200 °C for 4 h (b).

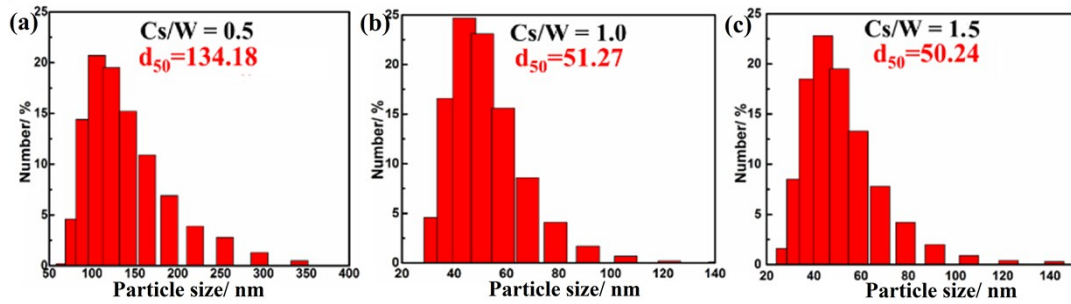

**Fig. S3.** Particle size distributions of aqueous dispersions of  $Cs_xWO_3$  synthesized with Cs/W ratio of (a) 0.5, (b) 1 and (c) 1.5.

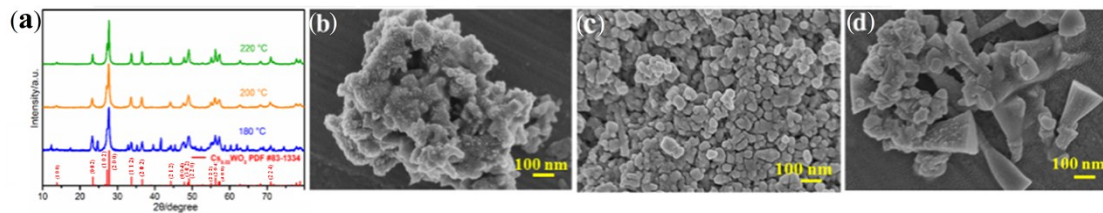

**Fig. S4.** XRD patterns (a) and SEM images of  $Cs_xWO_3$  at 180 °C (b), 200 °C (c), 220 °C (d) with reaction time of 4 h.

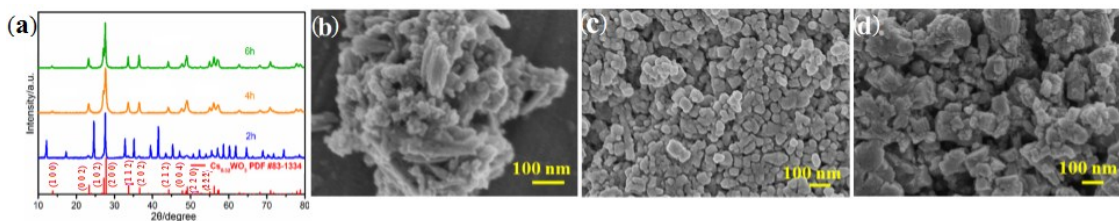

**Fig. S5.** XRD patterns (a) and SEM images of  $Cs_xWO_3$  at 200 °C with reaction time of 2 h (b), 4 h (c) and 6 h (d).

The XRD patterns and SEM images shown when the reaction temperature exceeded 200 °C (Fig. S4) or time exceeded 4 h (Fig. S5), the size of particles are usually more than several hundred nanometers but the improvement of crystalline is modest. In addition, when the reaction temperature under 200 °C or time shorter than 4 h, the impure phase would appear. Hence, the factor, namely 200 °C and 4 h was selected for the manuscript.

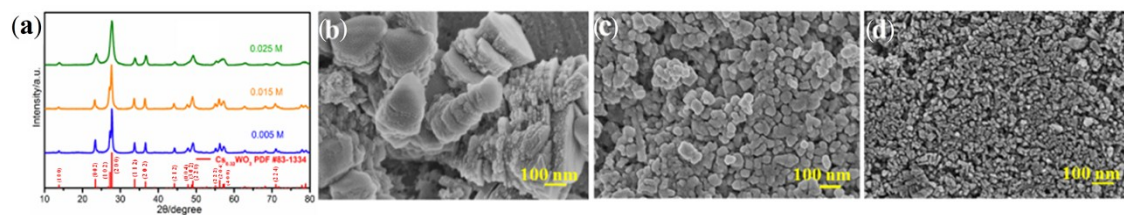

**Fig. S6.** XRD patterns (a) and SEM images of  $\text{Cs}_x\text{WO}_3$  at  $200\text{ }^\circ\text{C}$ , 4h with concentration of  $\text{WCl}_6$  at (b) 0.005 M, (c) 0.015 M, and (d) 0.025 M.

The concentration of  $\text{WCl}_6$  also has a great impact on reaction process (Fig. S6). When concentration of  $\text{WCl}_6$  is 0.005 M, the nanoparticles is of good crystalline but larger size. Increasing the concentration to 0.025 M, instead, the particles are too small to have a high degree of crystalline.
